# Supplementary material
Source: publisher figshare collection journal article supplement (https://gsajournals.figshare.com/ndownloader/files/15459056)
Supplement: Supplementary file 1 [file 15459056]

## Sheet: SNPs
Table S1. SNPs defining the D0 haplogroup
CHR	POS	REF	ALT	Ancestral Allele	Haplogroup D0	Haplogroup D	Haplogroup E	Notes
Y	2668496	G	T	G	T	G	G	SNP on branch D0
Y	2684790	G	A,T	G	A	G	G	SNP on branch D0
Y	2746443	T	G	T	G	T	T	SNP on branch D0
Y	2759823	C	A,G	C	G	C	C	SNP on branch D0
Y	2763977	T	C,G	T	G	T	T	SNP on branch D0
Y	2774691	C	T	C	T	C	C	SNP on branch D0
Y	2794108	C	G	C	G	C	C	SNP on branch D0
Y	2824252	G	A	G	A	G	G	SNP on branch D0
Y	2848910	A	G	A	G	A	A	SNP on branch D0
Y	2850963	C	T	C	T	C	C	SNP on branch D0
Y	2853798	C	A	C	A	C	C	SNP on branch D0
Y	6676225	C	T	C	T	C	C	SNP on branch D0
Y	6708971	G	A	G	A	G	G	SNP on branch D0
Y	6721247	C	A,T	C	T	C	C	SNP on branch D0
Y	6747175	C	T	C	T	C	C	SNP on branch D0
Y	6747201	T	A	T	A	T	T	SNP on branch D0
Y	6753316	C	A,G	C	G	C	C	SNP on branch D0
Y	6797098	A	G	A	G	A	A	SNP on branch D0
Y	6821366	T	C	T	C	T	T	SNP on branch D0
Y	6831372	A	C,G	A	G	A	A	SNP on branch D0
Y	6868284	C	G	C	G	C	C	SNP on branch D0
Y	6889983	C	T	C	T	C	C	SNP on branch D0
Y	6893436	G	A	G	A	G	G	SNP on branch D0
Y	6895235	G	A,C	G	A	G	G	SNP on branch D0
Y	6917321	T	C,G	T	C	T	T	SNP on branch D0
Y	6941294	A	T	A	T	A	A	SNP on branch D0
Y	6949806	G	A	G	A	G	G	SNP on branch D0
Y	7011465	G	A	G	A	G	G	SNP on branch D0
Y	7034919	C	A	C	A	C	C	SNP on branch D0
Y	7079439	G	A	G	A	G	G	SNP on branch D0
Y	7188219	A	T	A	T	A	A	SNP on branch D0
Y	7210681	C	T	C	T	C	C	SNP on branch D0
Y	7242606	G	C	G	C	G	G	SNP on branch D0
Y	7255622	A	T	A	T	A	A	SNP on branch D0
Y	7265843	T	C	T	C	T	T	SNP on branch D0
Y	7270582	G	T	G	T	G	G	SNP on branch D0
Y	7273551	G	A	G	A	G	G	SNP on branch D0
Y	7277533	A	G	A	G	A	A	SNP on branch D0
Y	7341810	C	T	C	T	C	C	SNP on branch D0
Y	7347990	A	C,G	A	G	A	A	SNP on branch D0
Y	7378003	A	G	A	G	A	A	SNP on branch D0
Y	7410122	C	T	C	T	C	C	SNP on branch D0
Y	7570251	A	G	A	G	A	A	SNP on branch D0
Y	7578738	G	A,C	G	A	G	G	SNP on branch D0
Y	7579824	G	C	G	C	G	G	SNP on branch D0
Y	7582262	G	T	G	T	G	G	SNP on branch D0
Y	7620047	A	G	A	G	A	A	SNP on branch D0
Y	7622045	C	T	C	T	C	C	SNP on branch D0
Y	7678762	A	T	A	T	A	A	SNP on branch D0
Y	7694383	A	C	A	C	A	A	SNP on branch D0
Y	7716819	A	T	A	T	A	A	SNP on branch D0
Y	7774460	G	A	G	A	G	G	SNP on branch D0
Y	7774466	A	C	A	C	A	A	SNP on branch D0
Y	7774495	G	A	G	A	G	G	SNP on branch D0
Y	7801104	C	G	C	G	C	C	SNP on branch D0
Y	7851738	C	G,T	C	G	C	C	SNP on branch D0
Y	7876921	A	G	A	G	A	A	SNP on branch D0
Y	7893690	C	A	C	A	C	C	SNP on branch D0
Y	7901352	G	T	G	T	G	G	SNP on branch D0
Y	7929183	G	T	G	T	G	G	SNP on branch D0
Y	7982853	A	G	A	G	A	A	SNP on branch D0
Y	8016678	C	T	C	T	C	C	SNP on branch D0
Y	8058955	G	A	G	A	G	G	SNP on branch D0
Y	8060600	A	G	A	G	A	A	SNP on branch D0
Y	8063190	G	C,T	G	T	G	G	SNP on branch D0
Y	8081026	A	G	A	G	A	A	SNP on branch D0
Y	8088679	C	G	C	G	C	C	SNP on branch D0
Y	8090376	A	G	A	G	A	A	SNP on branch D0
Y	8095674	A	G	A	G	A	A	SNP on branch D0
Y	8121376	G	A	G	A	G	G	SNP on branch D0
Y	8155013	C	G	C	G	C	C	SNP on branch D0
Y	8156277	G	A	G	A	G	G	SNP on branch D0
Y	8174610	G	A	G	A	G	G	SNP on branch D0
Y	8184538	A	G	A	G	A	A	SNP on branch D0
Y	8200057	T	C	T	C	T	T	SNP on branch D0
Y	8226806	A	G,T	A	T	A	A	SNP on branch D0
Y	8227145	T	A,C	T	C	T	T	SNP on branch D0
Y	8240623	C	A,T	C	T	C	C	SNP on branch D0
Y	8254941	A	C	A	C	A	A	SNP on branch D0
Y	8280068	C	T	C	T	C	C	SNP on branch D0
Y	8310894	A	G	A	G	A	A	SNP on branch D0
Y	8323918	G	T	G	T	G	G	SNP on branch D0
Y	8329083	T	C	T	C	T	T	SNP on branch D0
Y	8343705	G	A	G	A	G	G	SNP on branch D0
Y	8356071	A	C	A	C	A	A	SNP on branch D0
Y	8361702	C	T	C	T	C	C	SNP on branch D0
Y	8364936	T	C	T	C	T	T	SNP on branch D0
Y	8372651	A	G	A	G	A	A	SNP on branch D0
Y	8445499	C	G	C	G	C	C	SNP on branch D0
Y	8465733	C	T	C	T	C	C	SNP on branch D0
Y	8466101	C	T	C	T	C	C	SNP on branch D0
Y	8467167	G	A	G	A	G	G	SNP on branch D0
Y	8503452	C	G	C	G	C	C	SNP on branch D0
Y	8538145	G	T	G	T	G	G	SNP on branch D0
Y	8575106	T	A	T	A	T	T	SNP on branch D0
Y	8584879	A	G	A	G	A	A	SNP on branch D0
Y	8602076	A	C	A	C	A	A	SNP on branch D0
Y	8691053	A	C	A	C	A	A	SNP on branch D0
Y	8722220	C	T	C	T	C	C	SNP on branch D0
Y	8793332	C	T	C	T	C	C	SNP on branch D0
Y	8794276	T	G	T	G	T	T	SNP on branch D0
Y	8797330	G	A	G	A	G	G	SNP on branch D0
Y	8824517	T	C,G	T	C	T	T	SNP on branch D0
Y	8839643	G	A	G	A	G	G	SNP on branch D0
Y	8842697	C	T	C	T	C	C	SNP on branch D0
Y	8856116	C	T	C	T	C	C	SNP on branch D0
Y	8859409	G	A	G	A	G	G	SNP on branch D0
Y	8901707	A	T	A	T	A	A	SNP on branch D0
Y	8989907	G	C	G	C	G	G	SNP on branch D0
Y	9017409	G	C	G	C	G	G	SNP on branch D0
Y	9025308	C	A	C	A	C	C	SNP on branch D0
Y	9037457	G	A	G	A	G	G	SNP on branch D0
Y	9038621	A	G	A	G	A	A	SNP on branch D0
Y	9143448	G	A	G	A	G	G	SNP on branch D0
Y	9393586	A	G	A	G	A	A	SNP on branch D0
Y	9446396	G	C	G	C	G	G	SNP on branch D0
Y	9799632	C	G	C	G	C	C	SNP on branch D0
Y	9806232	A	C,T	A	T	A	A	SNP on branch D0
Y	9832852	T	A,C,G	T	G	T	T	SNP on branch D0
Y	9836568	T	G	T	G	T	T	SNP on branch D0
Y	9869610	C	T	C	T	C	C	SNP on branch D0
Y	13888821	C	T	C	T	C	C	SNP on branch D0
Y	13930633	A	C	A	C	A	A	SNP on branch D0
Y	13992933	T	G	T	G	T	T	SNP on branch D0
Y	13994915	A	T	A	T	A	A	SNP on branch D0
Y	14002365	G	A	G	A	G	G	SNP on branch D0
Y	14003204	G	A	G	A	G	G	SNP on branch D0
Y	14021992	G	A	G	A	G	G	SNP on branch D0
Y	14053839	C	T	C	T	C	C	SNP on branch D0
Y	14081375	C	T	C	T	C	C	SNP on branch D0
Y	14097346	G	A	G	A	G	G	SNP on branch D0
Y	14103822	T	C	T	C	T	T	SNP on branch D0
Y	14109752	C	T	C	T	C	C	SNP on branch D0
Y	14134168	G	A,C	G	A	G	G	SNP on branch D0
Y	14141253	G	A	G	A	G	G	SNP on branch D0
Y	14179641	C	T	C	T	C	C	SNP on branch D0
Y	14187102	T	C	T	C	T	T	SNP on branch D0
Y	14194942	C	A	C	A	C	C	SNP on branch D0
Y	14208960	C	T	C	T	C	C	SNP on branch D0
Y	14211461	A	G	A	G	A	A	SNP on branch D0
Y	14235752	G	A	G	A	G	G	SNP on branch D0
Y	14237523	T	C	T	C	T	T	SNP on branch D0
Y	14245933	A	C,T	A	T	A	A	SNP on branch D0
Y	14246908	G	A	G	A	G	G	SNP on branch D0
Y	14248863	G	T	G	T	G	G	SNP on branch D0
Y	14257701	C	G	C	G	C	C	SNP on branch D0
Y	14260577	A	T	A	T	A	A	SNP on branch D0
Y	14280476	T	C	T	C	T	T	SNP on branch D0
Y	14288503	T	C	T	C	T	T	SNP on branch D0
Y	14288505	A	T	A	T	A	A	SNP on branch D0
Y	14305631	G	C	G	C	G	G	SNP on branch D0
Y	14312629	A	G	A	G	A	A	SNP on branch D0
Y	14318958	T	C	T	C	T	T	SNP on branch D0
Y	14330845	G	A	G	A	G	G	SNP on branch D0
Y	14374090	A	T	A	T	A	A	SNP on branch D0
Y	14374809	G	A	G	A	G	G	SNP on branch D0
Y	14399354	G	A	G	A	G	G	SNP on branch D0
Y	14414388	G	T	G	T	G	G	SNP on branch D0
Y	14419460	G	C,T	G	C	G	G	SNP on branch D0
Y	14450770	C	T	C	T	C	C	SNP on branch D0
Y	14500439	G	A	G	A	G	G	SNP on branch D0
Y	14525419	C	T	C	T	C	C	SNP on branch D0
Y	14585420	C	G	C	G	C	C	SNP on branch D0
Y	14609328	G	A,C	G	A	G	G	SNP on branch D0
Y	14666408	G	A	G	A	G	G	SNP on branch D0
Y	14670529	C	T	C	T	C	C	SNP on branch D0
Y	14719988	G	A	G	A	G	G	SNP on branch D0
Y	14747047	C	T	C	T	C	C	SNP on branch D0
Y	14749175	A	G	A	G	A	A	SNP on branch D0
Y	14779913	T	C	T	C	T	T	SNP on branch D0
Y	14804607	T	C	T	C	T	T	SNP on branch D0
Y	14871358	G	T	G	T	G	G	SNP on branch D0
Y	14880739	G	A	G	A	G	G	SNP on branch D0
Y	14899954	G	C	G	C	G	G	SNP on branch D0
Y	14906414	C	A	C	A	C	C	SNP on branch D0
Y	14932294	T	A	T	A	T	T	SNP on branch D0
Y	14937914	T	C	T	C	T	T	SNP on branch D0
Y	14939843	C	T	C	T	C	C	SNP on branch D0
Y	14958661	T	G	T	G	T	T	SNP on branch D0
Y	14968252	G	C	G	C	G	G	SNP on branch D0
Y	14988080	C	A	C	A	C	C	SNP on branch D0
Y	15008294	G	A,T	G	A	G	G	SNP on branch D0
Y	15027821	A	C	A	C	A	A	SNP on branch D0
Y	15091079	A	G	A	G	A	A	SNP on branch D0
Y	15093392	T	C	T	C	T	T	SNP on branch D0
Y	15134900	A	C,T	A	T	A	A	SNP on branch D0
Y	15156004	G	A	G	A	G	G	SNP on branch D0
Y	15263809	G	A	G	A	G	G	SNP on branch D0
Y	15267283	C	T	C	T	C	C	SNP on branch D0
Y	15304575	T	C	T	C	T	T	SNP on branch D0
Y	15329617	C	A	C	A	C	C	SNP on branch D0
Y	15346240	C	T	C	T	C	C	SNP on branch D0
Y	15359753	C	T	C	T	C	C	SNP on branch D0
Y	15361848	G	A	G	A	G	G	SNP on branch D0
Y	15386553	C	T	C	T	C	C	SNP on branch D0
Y	15405581	A	G	A	G	A	A	SNP on branch D0
Y	15407380	C	G	C	G	C	C	SNP on branch D0
Y	15409664	T	C	T	C	T	T	SNP on branch D0
Y	15421012	C	T	C	T	C	C	SNP on branch D0
Y	15430391	T	C	T	C	T	T	SNP on branch D0
Y	15454212	T	C	T	C	T	T	SNP on branch D0
Y	15485975	T	C	T	C	T	T	SNP on branch D0
Y	15492613	A	G	A	G	A	A	SNP on branch D0
Y	15556620	G	A	G	A	G	G	SNP on branch D0
Y	15565074	C	G	C	G	C	C	SNP on branch D0
Y	15569204	T	C	T	C	T	T	SNP on branch D0
Y	15573158	G	A	G	A	G	G	SNP on branch D0
Y	15576256	T	A,C	T	C	T	T	SNP on branch D0
Y	15586075	T	C,G	T	C	T	T	SNP on branch D0
Y	15590430	C	A	C	A	C	C	SNP on branch D0
Y	15606025	C	T	C	T	C	C	SNP on branch D0
Y	15649155	C	T	C	T	C	C	SNP on branch D0
Y	15650150	A	C,G	A	G	A	A	SNP on branch D0
Y	15650584	C	G	C	G	C	C	SNP on branch D0
Y	15654719	A	G	A	G	A	A	SNP on branch D0
Y	15654720	G	A	G	A	G	G	SNP on branch D0
Y	15720552	G	T	G	T	G	G	SNP on branch D0
Y	15728677	T	C	T	C	T	T	SNP on branch D0
Y	15741085	G	A,C	G	A	G	G	SNP on branch D0
Y	15753305	G	A	G	A	G	G	SNP on branch D0
Y	15759024	T	C	T	C	T	T	SNP on branch D0
Y	15773171	C	T	C	T	C	C	SNP on branch D0
Y	15813009	C	A	C	A	C	C	SNP on branch D0
Y	15857645	G	A	G	A	G	G	SNP on branch D0
Y	15877770	A	C,G	A	G	A	A	SNP on branch D0
Y	15904335	A	G	A	G	A	A	SNP on branch D0
Y	15915838	G	A	G	A	G	G	SNP on branch D0
Y	15919672	T	C	T	C	T	T	SNP on branch D0
Y	15928533	A	C,G	A	G	A	A	SNP on branch D0
Y	15940113	C	T	C	T	C	C	SNP on branch D0
Y	15949650	T	C	T	C	T	T	SNP on branch D0
Y	15976108	C	T	C	T	C	C	SNP on branch D0
Y	15995957	C	T	C	T	C	C	SNP on branch D0
Y	15997967	C	A,T	C	A	C	C	SNP on branch D0
Y	16207875	T	C	T	C	T	T	SNP on branch D0
Y	16215815	C	T	C	T	C	C	SNP on branch D0
Y	16247178	C	T	C	T	C	C	SNP on branch D0
Y	16250850	T	A,C	T	C	T	T	SNP on branch D0
Y	16285874	C	T	C	T	C	C	SNP on branch D0
Y	16304373	C	A,T	C	T	C	C	SNP on branch D0
Y	16312046	A	G	A	G	A	A	SNP on branch D0
Y	16351218	C	T	C	T	C	C	SNP on branch D0
Y	16362847	G	A	G	A	G	G	SNP on branch D0
Y	16398835	G	C	G	C	G	G	SNP on branch D0
Y	16428359	C	T	C	T	C	C	SNP on branch D0
Y	16435213	A	C	A	C	A	A	SNP on branch D0
Y	16500555	A	C	A	C	A	A	SNP on branch D0
Y	16504575	T	A	T	A	T	T	SNP on branch D0
Y	16508626	G	A	G	A	G	G	SNP on branch D0
Y	16547686	G	A	G	A	G	G	SNP on branch D0
Y	16578892	A	G	A	G	A	A	SNP on branch D0
Y	16648170	A	T	A	T	A	A	SNP on branch D0
Y	16688265	G	A	G	A	G	G	SNP on branch D0
Y	16756545	C	A	C	A	C	C	SNP on branch D0
Y	16766202	G	T	G	T	G	G	SNP on branch D0
Y	16790529	C	A	C	A	C	C	SNP on branch D0
Y	16801665	C	A,T	C	T	C	C	SNP on branch D0
Y	16835918	T	G	T	G	T	T	SNP on branch D0
Y	16852006	C	A	C	A	C	C	SNP on branch D0
Y	16874041	A	T	A	T	A	A	SNP on branch D0
Y	16929836	G	T	G	T	G	G	SNP on branch D0
Y	16972336	C	A,T	C	T	C	C	SNP on branch D0
Y	16975173	C	T	C	T	C	C	SNP on branch D0
Y	16981686	G	T	G	T	G	G	SNP on branch D0
Y	16982518	T	C	T	C	T	T	SNP on branch D0
Y	16999327	A	C	A	C	A	A	SNP on branch D0
Y	17070326	C	T	C	T	C	C	SNP on branch D0
Y	17098346	C	T	C	T	C	C	SNP on branch D0
Y	17111150	C	T	C	T	C	C	SNP on branch D0
Y	17131671	G	T	G	T	G	G	SNP on branch D0
Y	17152734	G	T	G	T	G	G	SNP on branch D0
Y	17221253	G	A	G	A	G	G	SNP on branch D0
Y	17232821	A	G	A	G	A	A	SNP on branch D0
Y	17238111	G	A	G	A	G	G	SNP on branch D0
Y	17277598	A	G	A	G	A	A	SNP on branch D0
Y	17300065	C	A,T	C	T	C	C	SNP on branch D0
Y	17323499	G	C,T	G	C	G	G	SNP on branch D0
Y	17372204	C	T	C	T	C	C	SNP on branch D0
Y	17420429	G	A	G	A	G	G	SNP on branch D0
Y	17426707	T	C	T	C	T	T	SNP on branch D0
Y	17465843	G	A	G	A	G	G	SNP on branch D0
Y	17496835	G	A,C	G	A	G	G	SNP on branch D0
Y	17530902	A	C	A	C	A	A	SNP on branch D0
Y	17546996	C	T	C	T	C	C	SNP on branch D0
Y	17569596	G	A	G	A	G	G	SNP on branch D0
Y	17572599	G	C	G	C	G	G	SNP on branch D0
Y	17583888	G	T	G	T	G	G	SNP on branch D0
Y	17600941	T	A	T	A	T	T	SNP on branch D0
Y	17605224	C	A	C	A	C	C	SNP on branch D0
Y	17611578	A	G	A	G	A	A	SNP on branch D0
Y	17612716	C	A	C	A	C	C	SNP on branch D0
Y	17616784	A	C	A	C	A	A	SNP on branch D0
Y	17625292	T	C	T	C	T	T	SNP on branch D0
Y	17631594	C	T	C	T	C	C	SNP on branch D0
Y	17635514	G	A	G	A	G	G	SNP on branch D0
Y	17673481	A	G	A	G	A	A	SNP on branch D0
Y	17708490	A	C,G	A	G	A	A	SNP on branch D0
Y	17713132	T	A,C	T	C	T	T	SNP on branch D0
Y	17730899	T	A	T	A	T	T	SNP on branch D0
Y	17774409	G	A	G	A	G	G	SNP on branch D0
Y	17795962	G	A	G	A	G	G	SNP on branch D0
Y	17837771	C	T	C	T	C	C	SNP on branch D0
Y	17839512	T	C	T	C	T	T	SNP on branch D0
Y	17840656	A	G	A	G	A	A	SNP on branch D0
Y	17854404	G	A	G	A	G	G	SNP on branch D0
Y	17871478	A	G	A	G	A	A	SNP on branch D0
Y	17905232	C	G	C	G	C	C	SNP on branch D0
Y	17957591	T	C	T	C	T	T	SNP on branch D0
Y	17963043	G	T	G	T	G	G	SNP on branch D0
Y	17965193	A	C	A	C	A	A	SNP on branch D0
Y	18063984	C	T	C	T	C	C	SNP on branch D0
Y	18066111	C	G	C	G	C	C	SNP on branch D0
Y	18096914	G	C,T	G	C	G	G	SNP on branch D0
Y	18101403	C	T	C	T	C	C	SNP on branch D0
Y	18159807	C	A	C	A	C	C	SNP on branch D0
Y	18206875	C	T	C	T	C	C	SNP on branch D0
Y	18211128	T	C	T	C	T	T	SNP on branch D0
Y	18254196	C	T	C	T	C	C	SNP on branch D0
Y	18562963	T	C	T	C	T	T	SNP on branch D0
Y	18592596	G	A	G	A	G	G	SNP on branch D0
Y	18620031	G	A,T	G	A	G	G	SNP on branch D0
Y	18687010	C	A	C	A	C	C	SNP on branch D0
Y	18708674	C	A,T	C	T	C	C	SNP on branch D0
Y	18749926	T	C	T	C	T	T	SNP on branch D0
Y	18753056	G	A	G	A	G	G	SNP on branch D0
Y	18777364	A	G	A	G	A	A	SNP on branch D0
Y	18806613	C	T	C	T	C	C	SNP on branch D0
Y	18889866	G	T	G	T	G	G	SNP on branch D0
Y	18911543	A	G	A	G	A	A	SNP on branch D0
Y	18964792	G	C	G	C	G	G	SNP on branch D0
Y	18966290	G	A	G	A	G	G	SNP on branch D0
Y	19025196	A	G	A	G	A	A	SNP on branch D0
Y	19092442	C	T	C	T	C	C	SNP on branch D0
Y	19133279	T	C	T	C	T	T	SNP on branch D0
Y	19134383	C	T	C	T	C	C	SNP on branch D0
Y	19155428	G	T	G	T	G	G	SNP on branch D0
Y	19160994	G	A	G	A	G	G	SNP on branch D0
Y	19209312	C	T	C	T	C	C	SNP on branch D0
Y	19267189	A	C,G	A	G	A	A	SNP on branch D0
Y	19277949	T	G	T	G	T	T	SNP on branch D0
Y	19284117	C	T	C	T	C	C	SNP on branch D0
Y	19328534	A	T	A	T	A	A	SNP on branch D0
Y	19367635	T	G	T	G	T	T	SNP on branch D0
Y	19411026	A	G	A	G	A	A	SNP on branch D0
Y	19424791	C	T	C	T	C	C	SNP on branch D0
Y	19426445	C	T	C	T	C	C	SNP on branch D0
Y	19437058	C	A,G,T	C	T	C	C	SNP on branch D0
Y	19438023	G	A	G	A	G	G	SNP on branch D0
Y	19448656	C	T	C	T	C	C	SNP on branch D0
Y	19495738	G	A	G	A	G	G	SNP on branch D0
Y	19496243	T	C,G	T	C	T	T	SNP on branch D0
Y	19499938	G	A	G	A	G	G	SNP on branch D0
Y	19501594	C	T	C	T	C	C	SNP on branch D0
Y	19509942	C	G,T	C	T	C	C	SNP on branch D0
Y	19527979	C	A	C	A	C	C	SNP on branch D0
Y	19538674	T	C	T	C	T	T	SNP on branch D0
Y	21073079	C	A	C	A	C	C	SNP on branch D0
Y	21082726	C	T	C	T	C	C	SNP on branch D0
Y	21134961	G	A,C	G	A	G	G	SNP on branch D0
Y	21138948	G	T	G	T	G	G	SNP on branch D0
Y	21143021	A	C	A	C	A	A	SNP on branch D0
Y	21143443	T	C,G	T	C	T	T	SNP on branch D0
Y	21250107	G	A	G	A	G	G	SNP on branch D0
Y	21260548	G	A	G	A	G	G	SNP on branch D0
Y	21263431	C	T	C	T	C	C	SNP on branch D0
Y	21270765	T	A	T	A	T	T	SNP on branch D0
Y	21282240	T	C	T	C	T	T	SNP on branch D0
Y	21284949	A	C,G	A	G	A	A	SNP on branch D0
Y	21297607	G	A	G	A	G	G	SNP on branch D0
Y	21318800	G	A	G	A	G	G	SNP on branch D0
Y	21326964	C	T	C	T	C	C	SNP on branch D0
Y	21353436	G	A	G	A	G	G	SNP on branch D0
Y	21369802	A	G	A	G	A	A	SNP on branch D0
Y	21379315	T	G	T	G	T	T	SNP on branch D0
Y	21447391	A	T	A	T	A	A	SNP on branch D0
Y	21472585	A	T	A	T	A	A	SNP on branch D0
Y	21472598	A	G	A	G	A	A	SNP on branch D0
Y	21481057	G	A	G	A	G	G	SNP on branch D0
Y	21491737	A	G	A	G	A	A	SNP on branch D0
Y	21493978	G	T	G	T	G	G	SNP on branch D0
Y	21537520	A	C	C	A	A	A	SNP on branch D0
Y	21539806	G	A,T	G	A	G	G	SNP on branch D0
Y	21545069	G	A	G	A	G	G	SNP on branch D0
Y	21551016	C	T	C	T	C	C	SNP on branch D0
Y	21555791	G	C	G	C	G	G	SNP on branch D0
Y	21559261	G	T	G	T	G	G	SNP on branch D0
Y	21562163	A	C	A	C	A	A	SNP on branch D0
Y	21571786	C	T	C	T	C	C	SNP on branch D0
Y	21579488	T	C	T	C	T	T	SNP on branch D0
Y	21626431	C	A	C	A	C	C	SNP on branch D0
Y	21635462	G	A	G	A	G	G	SNP on branch D0
Y	21674409	A	G	A	G	A	A	SNP on branch D0
Y	21677887	A	G	A	G	A	A	SNP on branch D0
Y	21686075	G	A	G	A	G	G	SNP on branch D0
Y	21718932	C	A	C	A	C	C	SNP on branch D0
Y	21738640	A	T	A	T	A	A	SNP on branch D0
Y	21817774	G	T	G	T	G	G	SNP on branch D0
Y	21862376	G	A	G	A	G	G	SNP on branch D0
Y	21870701	A	G	A	G	A	A	SNP on branch D0
Y	21888494	G	A	G	A	G	G	SNP on branch D0
Y	21914507	C	T	C	T	C	C	SNP on branch D0
Y	21963685	C	A	C	A	C	C	SNP on branch D0
Y	21980440	A	T	A	T	A	A	SNP on branch D0
Y	21991481	C	T	C	T	C	C	SNP on branch D0
Y	22023057	T	C	T	C	T	T	SNP on branch D0
Y	22066023	C	T	C	T	C	C	SNP on branch D0
Y	22090416	C	A	C	A	C	C	SNP on branch D0
Y	22091959	A	C,G	A	G	A	A	SNP on branch D0
Y	22095736	A	C	A	C	A	A	SNP on branch D0
Y	22204423	C	A	C	A	C	C	SNP on branch D0
Y	22206482	T	C	T	C	T	T	SNP on branch D0
Y	22545071	A	C	A	C	A	A	SNP on branch D0
Y	22554520	G	T	G	T	G	G	SNP on branch D0
Y	22570658	C	G	C	G	C	C	SNP on branch D0
Y	22656596	T	C	T	C	T	T	SNP on branch D0
Y	22695457	C	A,T	C	T	C	C	SNP on branch D0
Y	22695458	A	G	A	G	A	A	SNP on branch D0
Y	22713623	G	A,C	G	A	G	G	SNP on branch D0
Y	22741850	C	G	C	G	C	C	SNP on branch D0
Y	22762400	C	T	C	T	C	C	SNP on branch D0
Y	22795562	C	A	C	A	C	C	SNP on branch D0
Y	22828227	C	A	C	A	C	C	SNP on branch D0
Y	22831056	C	T	C	T	C	C	SNP on branch D0
Y	22834876	A	G	A	G	A	A	SNP on branch D0
Y	22859408	G	T	G	T	G	G	SNP on branch D0
Y	22877026	A	G	A	G	A	A	SNP on branch D0
Y	22891209	A	G	A	G	A	A	SNP on branch D0
Y	22957062	T	G	T	G	T	T	SNP on branch D0
Y	22981592	G	A	G	A	G	G	SNP on branch D0
Y	22983357	A	T	A	T	A	A	SNP on branch D0
Y	22989279	T	C	T	C	T	T	SNP on branch D0
Y	22989825	T	G	T	G	T	T	SNP on branch D0
Y	23021904	A	G	A	G	A	A	SNP on branch D0
Y	23036719	C	A,T	C	T	C	C	SNP on branch D0
Y	23045034	T	G	T	G	T	T	SNP on branch D0
Y	23046699	A	G	A	G	A	A	SNP on branch D0
Y	23056406	G	C	G	C	G	G	SNP on branch D0
Y	23079345	G	A	G	A	G	G	SNP on branch D0
Y	23089277	C	T	C	T	C	C	SNP on branch D0
Y	23096248	G	A	G	A	G	G	SNP on branch D0
Y	23098745	A	G	A	G	A	A	SNP on branch D0
Y	23108446	G	A	G	A	G	G	SNP on branch D0
Y	23111012	C	A	C	A	C	C	SNP on branch D0
Y	23122442	A	T	A	T	A	A	SNP on branch D0
Y	23124543	G	A	G	A	G	G	SNP on branch D0
Y	23144492	G	A,T	G	A	G	G	SNP on branch D0
Y	23146811	G	C	G	C	G	G	SNP on branch D0
Y	23154044	C	T	C	T	C	C	SNP on branch D0
Y	23155355	A	G	A	G	A	A	SNP on branch D0
Y	23273837	C	G	C	G	C	C	SNP on branch D0
Y	23292618	C	T	C	T	C	C	SNP on branch D0
Y	23348356	T	C,G	T	G	T	T	SNP on branch D0
Y	23350698	T	C	T	C	T	T	SNP on branch D0
Y	23369345	G	A	G	A	G	G	SNP on branch D0
Y	23377470	A	G	A	G	A	A	SNP on branch D0
Y	23382836	C	A	C	A	C	C	SNP on branch D0
Y	23436143	A	C,T	A	T	A	A	SNP on branch D0
Y	23441139	G	C	G	C	G	G	SNP on branch D0
Y	23450248	A	G	A	G	A	A	SNP on branch D0
Y	23462529	G	A	G	A	G	G	SNP on branch D0
Y	23499910	A	G	A	G	A	A	SNP on branch D0
Y	23504298	A	T	A	T	A	A	SNP on branch D0
Y	23523496	G	C	G	C	G	G	SNP on branch D0
Y	23575674	G	A	G	A	G	G	SNP on branch D0
Y	23583903	T	C,G	T	C	T	T	SNP on branch D0
Y	23594139	C	T	C	T	C	C	SNP on branch D0
Y	23749105	T	C,G	T	C	T	T	SNP on branch D0
Y	23758375	C	G	C	G	C	C	SNP on branch D0
Y	23761946	A	G	A	G	A	A	SNP on branch D0
Y	23797822	C	A,T	C	T	C	C	SNP on branch D0
Y	23849932	G	A	G	A	G	G	SNP on branch D0
Y	23852103	G	A	G	A	G	G	SNP on branch D0
Y	23857560	A	C	A	C	A	A	SNP on branch D0
Y	23860258	A	G	A	G	A	A	SNP on branch D0
Y	23872967	G	A	G	A	G	G	SNP on branch D0
Y	23968194	C	T	C	T	C	C	SNP on branch D0
Y	24459882	A	G	A	G	A	A	SNP on branch D0
Y	28604656	G	C	G	C	G	G	SNP on branch D0
Y	28615774	G	T	G	T	G	G	SNP on branch D0
Y	28639397	T	C	T	C	T	T	SNP on branch D0
Y	28654892	G	A	G	A	G	G	SNP on branch D0
Y	28655745	T	C	T	C	T	T	SNP on branch D0
Y	28676222	G	A	G	A	G	G	SNP on branch D0
Y	28705352	C	T	C	T	C	C	SNP on branch D0
Y	28731389	G	A	G	A	G	G	SNP on branch D0
Y	28741469	C	T	C	T	C	C	SNP on branch D0
Y	28747656	T	A	T	A	T	T	SNP on branch D0
Y	28750611	T	A,G	T	A	T	T	SNP on branch D0
Y	28761112	G	A	G	A	G	G	SNP on branch D0
Y	8685674	C	T	C	T	C	C	SNP on branch D0 recurs elsewhere (C1b2a)
Y	2708779	A	C,G	A	G	A	A	SNP on branch D0 recurs elsewhere (F2)
Y	23554761	A	C	A	C	A	C	SNP on branch D0 recurs on E (or back mutation on D)
Y	15281995	G	A	G	A	A	G	SNP on branch D0|D
Y	15343571	T	C	T	C	C	T	SNP on branch D0|D
Y	15343575	T	G	T	G	G	T	SNP on branch D0|D
Y	17545328	C	T	C	T	T	C	SNP on branch D0|D
Y	17839184	C	T	C	T	T	C	SNP on branch D0|D
Y	19025435	A	T	A	T	T	A	SNP on branch D0|D
Y	23286394	T	C	T	C	C	T	SNP on branch D0|D
Y	2728927	A	G	A	G	G	G	SNP on branch D0|D|E
Y	6931590	T	A,C,G	T	C	C	C	SNP on branch D0|D|E
Y	7169899	C	T	C	T	T	T	SNP on branch D0|D|E
Y	7320623	G	A	G	A	A	A	SNP on branch D0|D|E
Y	7332132	C	T	C	T	T	T	SNP on branch D0|D|E
Y	7540450	A	G	A	G	G	G	SNP on branch D0|D|E
Y	8072664	C	T	C	T	T	T	SNP on branch D0|D|E
Y	8816007	T	G	T	G	G	G	SNP on branch D0|D|E
Y	9142309	C	T	C	T	T	T	SNP on branch D0|D|E
Y	9851457	G	T	G	T	T	T	SNP on branch D0|D|E
Y	14842223	C	T	C	T	T	T	SNP on branch D0|D|E
Y	15543875	C	A,G,T	C	T	T	T	SNP on branch D0|D|E
Y	15590674	T	A	T	A	A	A	SNP on branch D0|D|E
Y	15591537	G	A,C,T	G	C	C	C	SNP on branch D0|D|E
Y	17011456	G	A,T	G	A	A	A	SNP on branch D0|D|E
Y	18561042	T	G	T	G	G	G	SNP on branch D0|D|E
Y	18907927	A	G	A	G	G	G	SNP on branch D0|D|E
Y	19338287	T	C	T	C	C	C	SNP on branch D0|D|E
Y	19370916	G	A	G	A	A	A	SNP on branch D0|D|E
Y	21227423	G	T	G	T	T	T	SNP on branch D0|D|E
Y	21306315	G	A	G	A	A	A	SNP on branch D0|D|E
Y	21398584	T	A,G	T	A	A	A	SNP on branch D0|D|E
Y	21458735	A	G,T	A	G	G	G	SNP on branch D0|D|E
Y	21582351	A	C,G	A	G	G	G	SNP on branch D0|D|E
Y	21717208	C	T	C	T	T	T	SNP on branch D0|D|E
Y	22014732	C	A,G	C	G	G	G	SNP on branch D0|D|E
Y	22721522	T	C	T	C	C	C	SNP on branch D0|D|E
Y	23109543	T	C,G	T	C	C	C	SNP on branch D0|D|E
Y	24392653	C	G	C	G	G	G	SNP on branch D0|D|E
